# Supplementary material for: Portable and simultaneous detection of four respiratory pathogens through a microfluidic LAMP and real-time fluorescence assay
Source: Royal Society of Chemistry journal article supplement (doi:10.1039/d4an00748d), 2024-01-01
Supplement: d4an00748d1.pdf [file d4an00748d1.pdf]

## Supporting Information

### **Portable and simultaneous detection of four respiratory pathogens through microfluidic LAMP and real-time fluorescent assay**

Junwen Liu<sup>a</sup>, Zhi Zeng<sup>b</sup>, Feina Li<sup>c</sup>, Bo Jiang<sup>a</sup>, You Nie<sup>a</sup>, Guohao Zhang<sup>d</sup>, Biao Pang<sup>d</sup>, Lin Sun<sup>c\*</sup>, Rongzhang Hao<sup>a\*</sup>

<sup>a</sup> School of Public Health, Capital Medical University, Beijing 100069, China

<sup>b</sup> School of Pharmacy, China Medical University, Shenyang 110122, China

<sup>c</sup> Beijing Key Laboratory of Pediatric Respiratory Infection Diseases, Key Laboratory of Major Diseases in Children, Ministry of Education, National Clinical Research Center for Respiratory Diseases, Laboratory of Respiratory Diseases, Beijing Pediatric Research Institute, Beijing Children's Hospital, Capital Medical University, National Center for Children's Health, Beijing 100006, China

<sup>d</sup> Beijing Baicare Biotechnology Co., Ltd., Beijing 102206, China

\*Corresponding author. *Email address:*

hao@ccmu.edu.cn (R. Hao),

sunlinbch@163.com (L. Sun)

## S1 Primer selection for *Mycoplasma pneumoniae*

The target sequences and LAMP primer sequences used are shown in Table S1 and S2, respectively. The fluorescence detection results of four LAMP primer sets for MP detection are shown in Fig. S1A, where the No. 1 primer set peaked earlier and took the shortest time to reach the detection plateau period. Therefore, the No. 1 MP primer set was selected for subsequent studies. Loop primers were absent in the stem-loop structure, and hence, a set of four primers including F3, B3, FIP, BIP was used to amplify the target sequence.

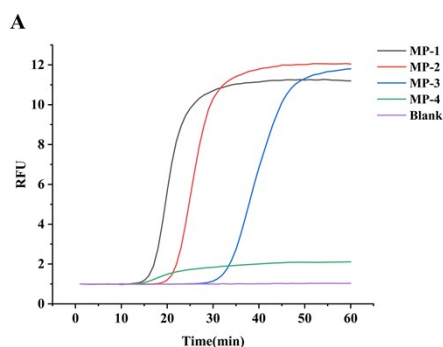

Fig. S1 (A) Fluorescence detection plot of LAMP primer screening for *Mycoplasma pneumoniae*.

## S2 Primer selection for respiratory syncytial virus type A

The target sequences and LAMP primer sequences used are shown in Table S1 and Table S2, respectively. The basic LAMP primers (F3, B3, FIP and BIP) were first screened. As shown in Fig. S2A, No. 2 basic primer set had an earlier peak onset and reached the highest fluorescence value faster, indicating that this primer set had the highest amplification efficiency. Loop primers were further designed and validated using the No. 2 basic primer set. As shown in Fig. S2B, the designed loop primers contained only LB, and the detection efficiency of the five primer sets were not statistically different. Based on the parallelism of the assays, No. 4 loop primer was chosen to accelerate the LAMP reaction.

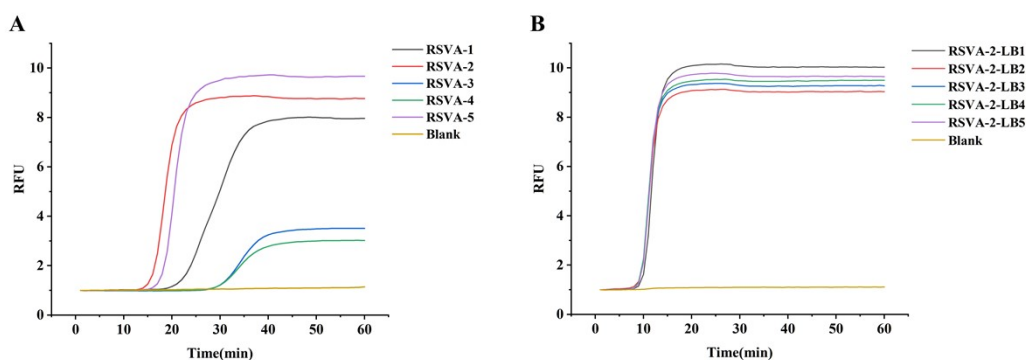

Fig. S2 (A) Fluorescence detection plot of the respiratory syncytial virus type A LAMP primer screen. (B) Fluorescence detection plot of a LAMP loop primer screen for respiratory syncytial virus type A.

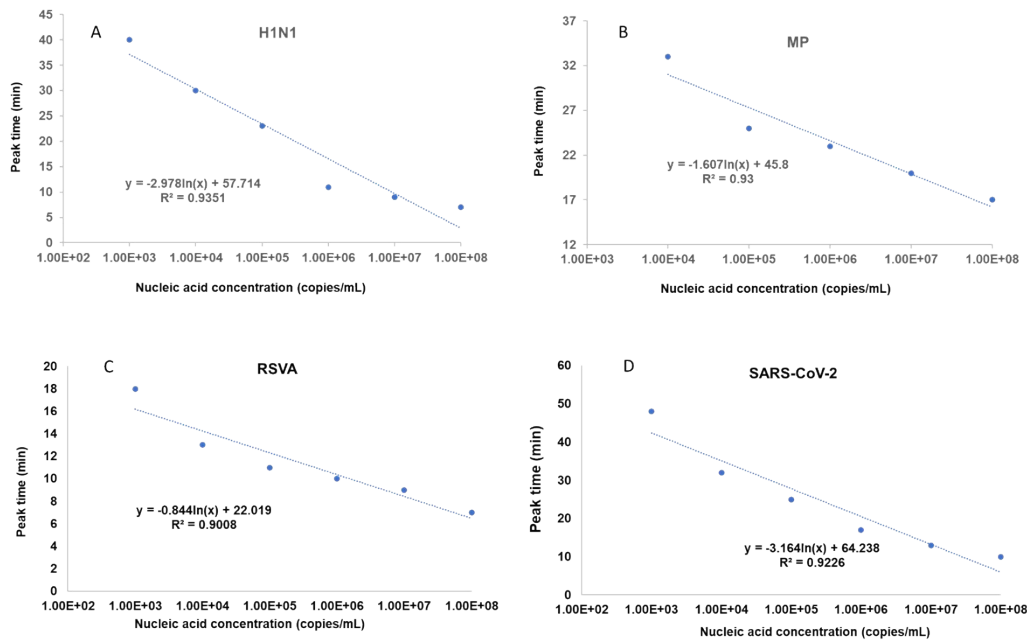

Fig. S3 The relationship between the LAMP peak time in tube and the concentration of target nucleic acid for the four respiratory pathogens.

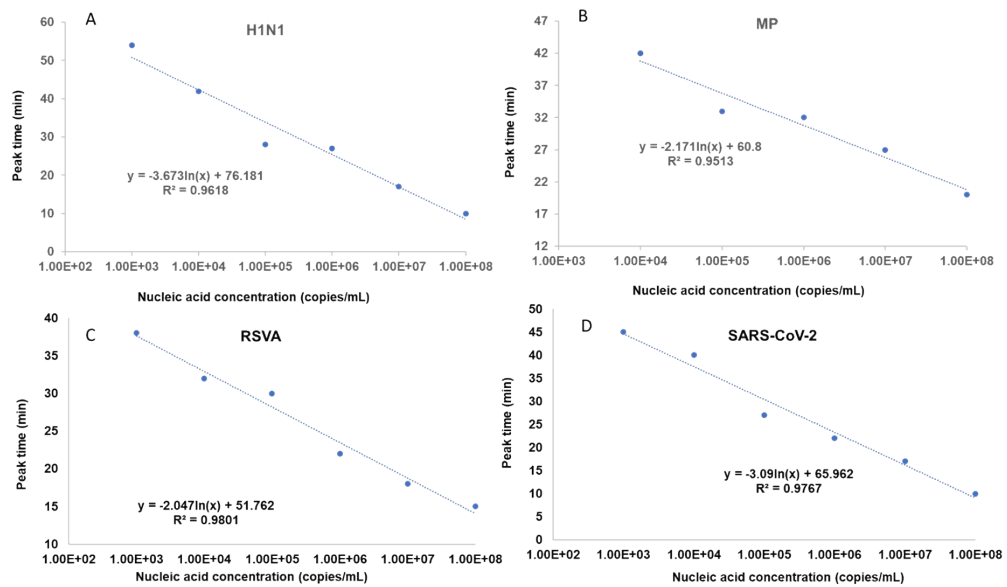

Fig. S4 The relationship between the peak time of microfluidic LAMP assay and the concentration of target nucleic acid for the four respiratory pathogens.

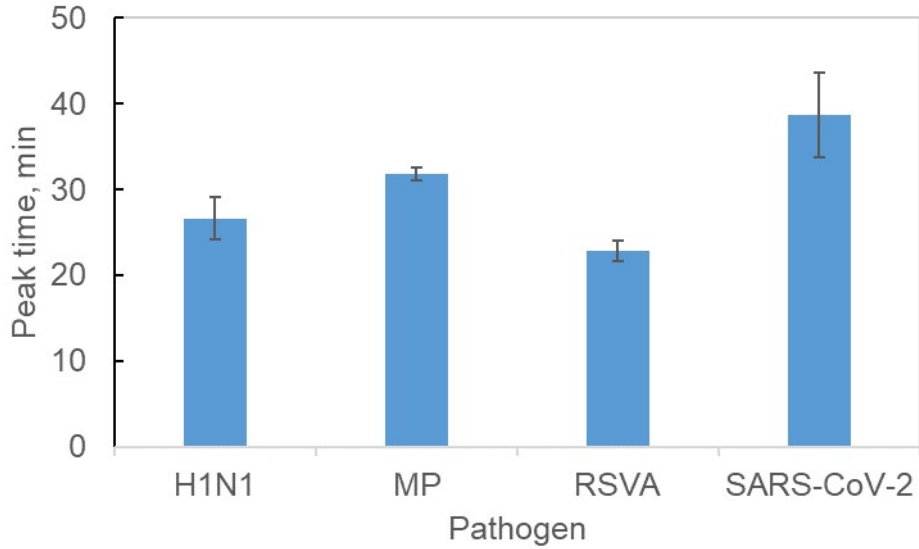

Fig. S5 The peak time of the microfluidic LAMP assay for the four respiratory pathogens. The error bars represent the standard deviation for three parallel experiments.

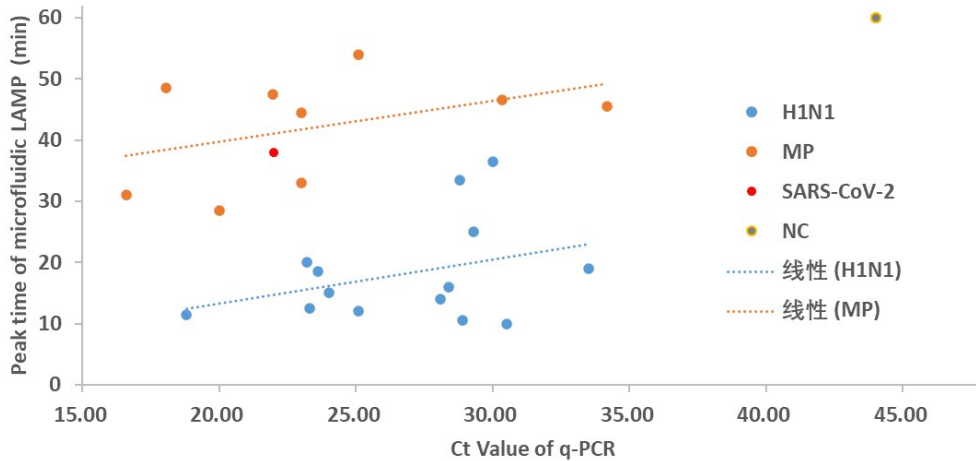

Fig. S6 The relation between PCR Ct value and the peak time of microfluidic LAMP assay for the clinical sample tests.

**Table S1.** The LAMP target sequences used in this work.

| Pathogen         | Target sequence(5'-3')                                                                                                                                                                                                                                                                                                                                                                                                                                                                         |
|------------------|------------------------------------------------------------------------------------------------------------------------------------------------------------------------------------------------------------------------------------------------------------------------------------------------------------------------------------------------------------------------------------------------------------------------------------------------------------------------------------------------|
| RSVA-LAMP-target | GACGATGATCCTGCATCGCTTACAATATGGGTGCCATTTTCAATCATCCATGCCAGCA<br>GATTTACTTATAAAAAGAACTAGCTAATGTCAATATACTAGTGAAAACAAATATCCACACC<br>CAAGGGACCCTCATTAAAGAGTCATGATAAACTCAAGAAGTGCAGTGCTAGCACAAATG<br>CCCAGCAAATTCACCATATGCGCCAATGTGTCCTTGGATGAAAAGAAGCAAGCTGGCAT<br>ATGATGTAACCACACCCTGTGAAATTAAGGCATGCAGTCTAACATGCCTAAAATCAAA<br>AAATATGTTGACTACAGTTAAAGATCTCACTATGAAAACACTCAACCCAACACATGAC<br>ATCATTGCTTTATGTGAATTTGAAAATATAGTAACATCAAAAAAAGTCATAATACCAAC<br>ATACCTAAGATCCATCAGTGTGAGAAATAAAGATCTGA |
| SARS-CoV-2-LAMP  | AAGGTTTACCCAATAATACTGCGTCTTGGTTCACCGCTCTCACTCAACATGGCAAGGAA<br>GACCTTAAATTCCCTCGAGGACAAGGCGTTCCAATTAACACCAATAGCAGTCCAGATG<br>ACCAAATTGGCTACTACCGAAGAGCTACCAGACGAATTCGTGGTGGTGACGGTAAAAT                                                                                                                                                                                                                                                                                                        |

|                          |                                                                                                                                                                                                                                                                                                                                                                                                                                                                                                                                                                                                                                                                                                                                                                                                                                                                                                                                                                                                                                                                                                                                                                                                                                                                                                                                                                          |
|--------------------------|--------------------------------------------------------------------------------------------------------------------------------------------------------------------------------------------------------------------------------------------------------------------------------------------------------------------------------------------------------------------------------------------------------------------------------------------------------------------------------------------------------------------------------------------------------------------------------------------------------------------------------------------------------------------------------------------------------------------------------------------------------------------------------------------------------------------------------------------------------------------------------------------------------------------------------------------------------------------------------------------------------------------------------------------------------------------------------------------------------------------------------------------------------------------------------------------------------------------------------------------------------------------------------------------------------------------------------------------------------------------------|
| target                   | GAAAGATCTCAGTCCAAGATGGTATTTCTACTACCTAGGAACTGGGCCAGAAGCTGGA<br>CTTCCCTATGGTGCTAACAAAGACGGCATCATATGGGTTGCAACTGAGGGAGCCTTGAA<br>TACACAAAAGATCACATTGGCACCCGCAATCCTGCTAACAAATGCTGCAATCGTGCTAC<br>AACTTCCTCAAGGAACAACATTGCCAAAAGGCTTCTACGCAGAAGGGGAGCAGAGGCCG<br>CAGTCAAGCCTCTTCTCGTTCCTCATCACGTAGTC<br>CCCCAAGACAAGTTCATGGCCCAATCATGACTCGAACAAAGGTGTAACGGCAGCATGT<br>CCTCATGCTGGAGCAAAAAGCTTCTACAAAAATTTAATATGGCTAGTTAAAAAAGGAA<br>ATTCATACCCAAAGCTCAGCAAATCCTACATTAATGATAAAGGGAAAGAAGTCTCGT<br>GCTATGGGGCATTACCATCCATCTACTAGTGCTGACCAACAAAGTCTCTATCAGAATG<br>CAGATGCATATGTTTTGTTTCAAGCCGGAATAGCGGGGACATCAAGATACAGCAAG<br>AAGTTCAAGCCGGAATAGCAATAAGACCCAAAGTGAGGGATCAAGAAGGGGAGAAATG<br>AACTATTACTGGACACTAGTAGAGCCGGGAGACAAAATAACATTCGAAGCAACTGGAA<br>ATCTAGTGGTACCGAGATATGCATTGCAATGGAAAGAAATGCTGGATCTGGTATTATC<br>ATTTTCAGATACACCAGTC<br>AAAAATGGCTTGTCTGAAATACCAAGAGTGGTGGTTCACAACACGATTTGTATGTATGT<br>CCTTTGAAAAATCCACCTAGTGATTTGGAAGAATTACAAATAATTGTTGATGAATGTAC<br>TACCCATGCGCAGTTTGTACTATGCGTGACGTGTTCTTTCTCCATAATAAACAGCTAGC<br>ACCTTCTTTGTTGATGTTTACAGCTAGGCTGGTATTGAAGGGGTTATTACTATACCCACAA<br>TTAAGTGGTTGATCTTATCAGATGAAAACACCAGATGGACAGATATTCTATGATCTAAA<br>AACTTCGAAAATCTTCTTTGTCCAGGACAACCAAAAACGTGTTCTTTCTCCATAATAAAC<br>TCAACAAAACAACTGGTTACAGCTGGGATTGAGTAGAATGGCTAAAACATGACATGAA<br>TGAGGACAAAAGACGAAAACTTTAAATGGTACTTTTCGCGTGATGACCTTACCATTCCCT<br>CCGTTGA |
| H1N1-<br>LAMP-<br>target |                                                                                                                                                                                                                                                                                                                                                                                                                                                                                                                                                                                                                                                                                                                                                                                                                                                                                                                                                                                                                                                                                                                                                                                                                                                                                                                                                                          |
| MP-<br>LAMP-<br>target   |                                                                                                                                                                                                                                                                                                                                                                                                                                                                                                                                                                                                                                                                                                                                                                                                                                                                                                                                                                                                                                                                                                                                                                                                                                                                                                                                                                          |

**Table S2.** The LAMP primer sequences used in this work.

| Pathogen   | Primer sequence(5'-3')                              |
|------------|-----------------------------------------------------|
| RSVA-1-F3  | TCAAAAATGCCATTACAAATGC                              |
| RSVA-1-B3  | GGTTTGATTGCAAATCGTGT                                |
| RSVA-1-FIP | TGCTCCTTTGTTGTCAGTCACTTTAAAAATCATCCCTTACTCAGGA      |
| RSVA-1-BIP | AGTAGATCTTGGAGCTTACCTAGAATTTAGCTGTGTGCTTCCAATT      |
| RSVA-2-F3  | ATACACAGCTGCTGTTCA                                  |
| RSVA-2-B3  | GTGAATTTGCTGGGCATT                                  |
| RSVA-2-FIP | GATTGAAACATGGGCACCCATATTTAATGTCCTAGAGAAAGACGAT      |
| RSVA-2-BIP | CTAGTGAAACAAATATCCACACCCATTTGCACTGCACTTCTTGAGTT     |
| RSVA-3-F3  | ACTAGTGAAACAAATATCCACAC                             |
| RSVA-3-B3  | GAGATCTTTAACTGTAGTCAACA                             |
| RSVA-3-FIP | GGTGAATTTGCTGGGCATTTGTTTTTCATTAAGAGTCATGATAAACTCAAG |
| RSVA-3-BIP | GCCAATGTGTCCTTGGATGAATTTTGTAGACTGCATGCCTTA          |
| RSVA-4-F3  | CTAGCACAAATGCCCAGC                                  |
| RSVA-4-B3  | GCAATGATGTCATGTGTTGG                                |
| RSVA-4-FIP | TGGTTACATCATATGCCAGCTTGTTTAAATTCACCATATGCGCCAA      |
| RSVA-4-BIP | CACCCTGTGAAATTAAGGCATGCTTTATAGTGAGATCTTTAACTGTAGTC  |
| RSVA-5-F3  | CCACTGAATTCAAAAATGCCA                               |
| RSVA-5-B3  | GGTTTGATTGCAAATCGTGT                                |
| RSVA-5-FIP | CCTTTGTTGTCAGTCACTGTGATGTTTTTACAAATGCAAAAATCATCCCT  |
| RSVA-5-BIP | AGTAGATCTTGGAGCTTACCTAGAATTTAGCTGTGTGCTTCCAATT      |

---

|            |                                                     |
|------------|-----------------------------------------------------|
| RSVA-2-LB1 | AGGGACCCTCATTAAGAGTCAT                              |
| RSVA-2-LB2 | AGGGACCCTCATTAAGAGTCATG                             |
| RSVA-2-LB3 | AGGGACCCTCATTAAGAGTCATGAT                           |
| RSVA-2-LB4 | GGGACCCTCATTAAGAGTCATGAT                            |
| RSVA-2-LB5 | GGGACCCTCATTAAGAGTCATGATA                           |
| MP-1-F3    | GGTGGTTCACAACACGATT                                 |
| MP-1-B3    | CATCTGATAAGATCAACCACTT                              |
| MP-1-FIP   | GCATGGGTAGTACATTCATCAACAATTTTGTATGTCCTTGAAAAATCCA   |
| MP-1-BIP   | TTGTTACTATGCGTGCAGCTAGTTTGGGTATAGTAATAACCCCTTCA     |
| MP-2-F3    | TCAGTTTCGGGTCTCCTC                                  |
| MP-2-B3    | TGCACGCATAGTAACAAAC                                 |
| MP-2-FIP   | TGTGAACCACCACTCTTGGTTTTTGAAGTGTAGGTCAAAGTAACTGAA    |
| MP-2-BIP   | ATGTCCTTTGAAAAATCCACCTAGTTTTGCATGGGTAGTACATTCATCA   |
| MP-3-F3    | TGAAAAATGGCTTGTCTGAA                                |
| MP-3-B3    | CTTCAATACCAGCCTAGCT                                 |
| MP-3-FIP   | ATCACTAGGTGGATTTTTTCAAAGGATTTATACCAAGAGTGGTGGTTCA   |
| MP-3-BIP   | GAATGTACTACCCATGCGCAGTTTACATCAACAAAGAAGGTGCTA       |
| MP-4-F3    | GCAGTTTGTACTATGCGTG                                 |
| MP-4-B3    | TTTATTATGGAGAAAGAACACGT                             |
| MP-4-FIP   | TTGTGGGGTATAGTAATAACCCCTTTTTAGCACCTTCTTTGTTGATGT    |
| MP-4-BIP   | TTATCAGATGAAAACACCAGATGGATTTGGACAAAGAAGATTTTCGAAGTT |

---
